# Supplementary figures and images for: Azoxymethane Alters the Plasma Metabolome to a Greater Extent in Mice Fed a High-Fat Diet Compared to an AIN-93 Diet
Source: MDPI journal article supplement (doi:10.3390/metabo11070448), 2021-07-09

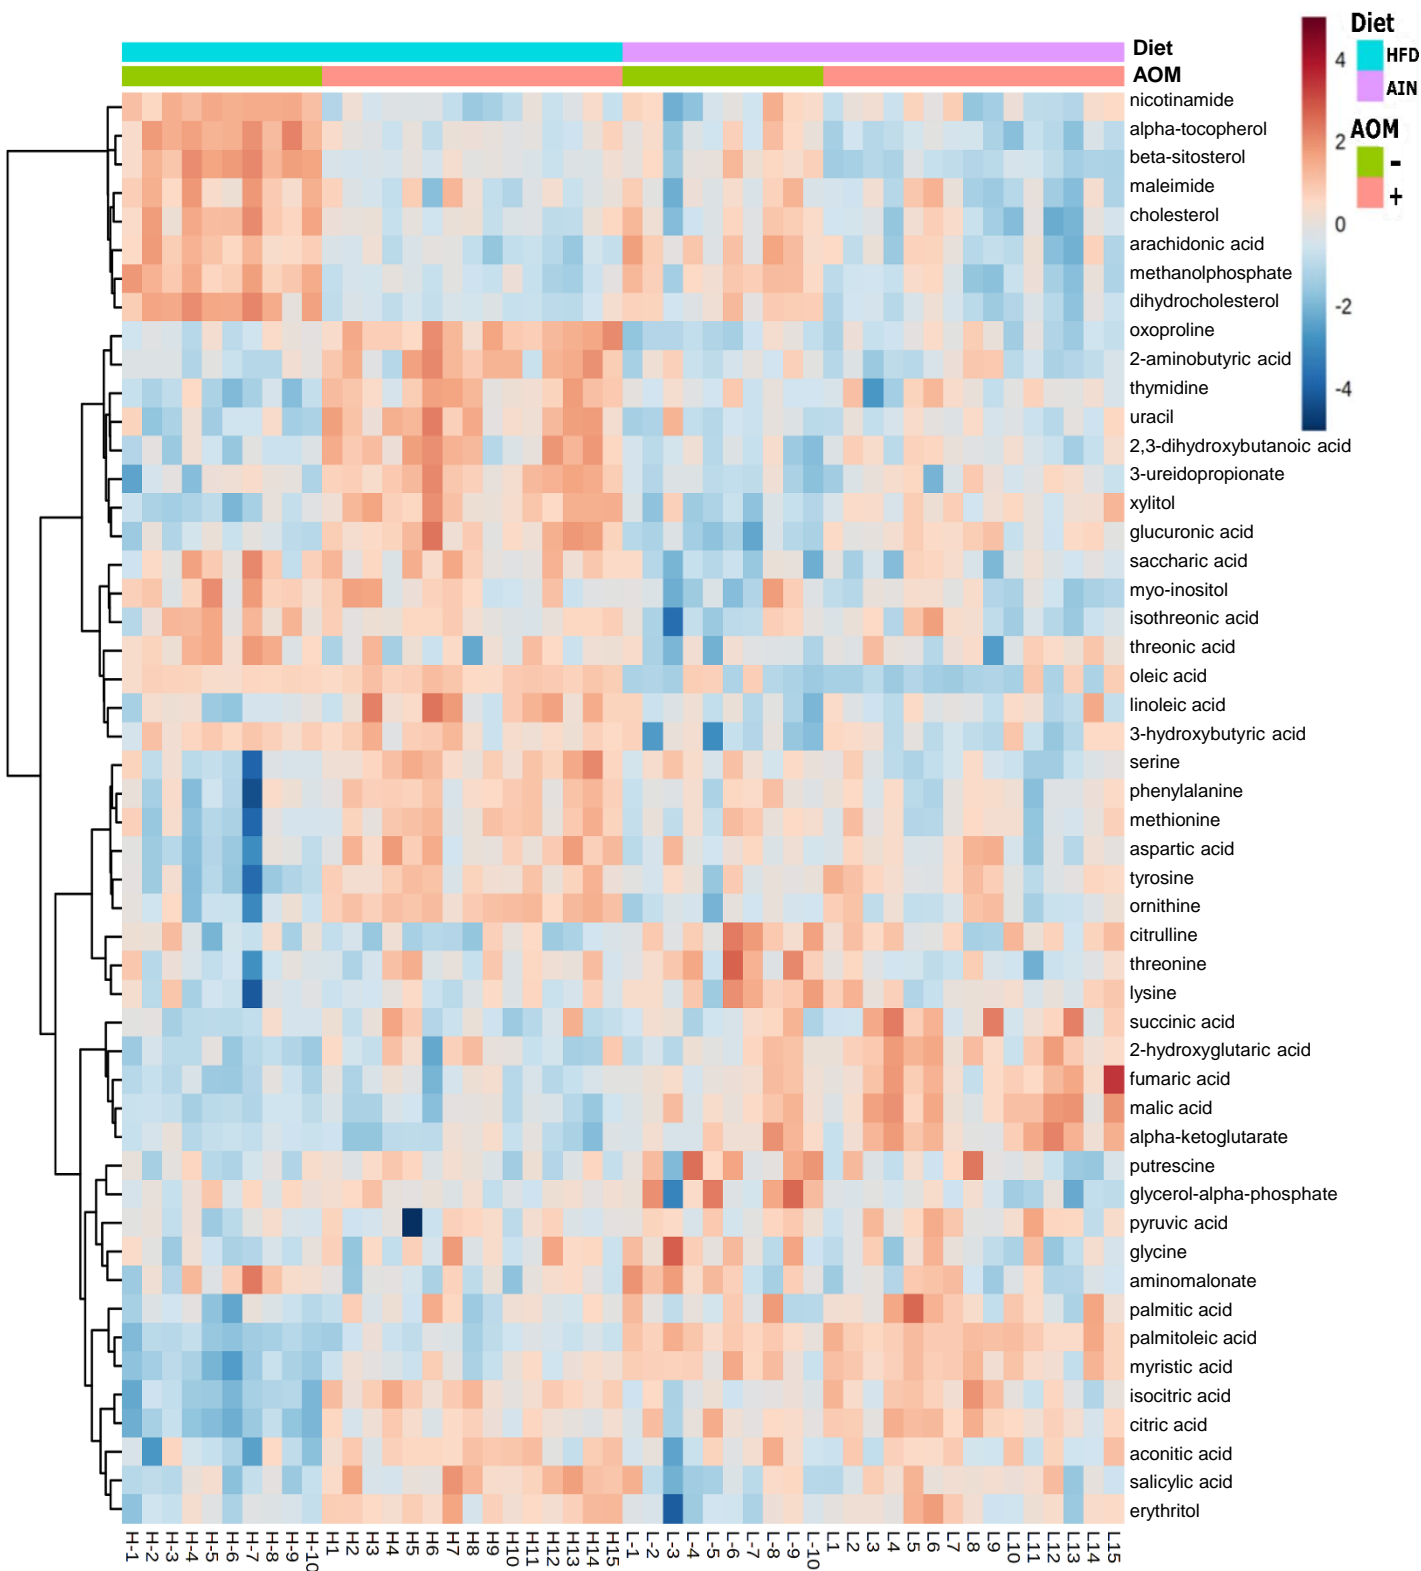

Supplementary Figure S1

Supplement: s1 [file s1]
